# Supplementary material for: Using Mobile Apps to Promote a Healthy Lifestyle Among Adolescents and Students: A Review of the Theoretical Basis and Lessons Learned
Source: PubMed Central journal article supplement (PMC4873621; doi:10.2196/mhealth.3559), 2016-05-05
Supplement: mhealth_v4i2e39_app1.pdf [file mhealth_v4i2e39_app1.pdf]

**Appendix 1: Search strategy Embase, Medline & PsycINFO  
27-11-2013**

| NO | HITS       | SEARCH EXPRESSION                                                        |
|----|------------|--------------------------------------------------------------------------|
| C= | 125810846  | ME00; EM00; PI67                                                         |
| S= | 2 4514     | TI=SMARTPHONE? OR TI=SMART PHONE? OR TI=MOBILE PHONE? OR TI=ANDROID?     |
|    | 3 18489    | TI=GAME OR TI=GAMES OR TI=GAMING                                         |
|    | 4 16124    | TI=MOBILE?                                                               |
|    | 6213758    | CT DOWN EXERCISE                                                         |
|    | 7120395    | CT DOWN SPORT                                                            |
|    | 8136526    | CT DOWN SPORTS                                                           |
|    | 9302364    | CT DOWN PHYSICAL ACTIVITY                                                |
|    | 10868101   | CT DOWN FOOD                                                             |
|    | 11470901   | CT DOWN BODY WEIGHT                                                      |
|    | 12874443   | CT DOWN NUTRITION                                                        |
|    | 132067944  | 6 OR 7 OR 8 OR 9 OR 10 OR 11 OR 12                                       |
|    | 17 9328    | AB=SMARTPHONE? OR AB=SMART PHONE? OR AB=MOBILE PHONE? OR AB=ANDROID?     |
|    | 19 94765   | S=6/W=1                                                                  |
|    | 20 68454   | S=7/W=1                                                                  |
|    | 21 68454   | S=8/W=1                                                                  |
|    | 22112407   | S=9/W=1                                                                  |
|    | 23469027   | S=10/W=1                                                                 |
|    | 24118259   | S=11/W=1                                                                 |
|    | 25338184   | S=12/W=1                                                                 |
|    | 26929361   | 19 OR 20 OR 21 OR 22 OR 23 OR 24 OR 25                                   |
|    | 291016737  | AB=APP OR AB=APPS OR AB=APPLICATION? OR AB=GAME OR AB=GAMES OR AB=GAMING |
|    | 3318785779 | PPS=HUMAN                                                                |
|    | 362126030  | ADOLESC? OR YOUNG ADULT? OR YOUNGSTER?                                   |
|    | 37 30362   | TEENAGE?                                                                 |
|    | 382130644  | 36 OR 37                                                                 |
|    | 45 444     | MHEALTH?                                                                 |
|    | 46 2001    | 29 AND (2 OR 17)                                                         |
|    | 47 2377    | 46 OR 45                                                                 |
|    | 48 116     | 47 AND 26                                                                |
|    | 49 2550    | 3 AND 13                                                                 |
|    | 50 8       | 49 AND 17                                                                |
|    | 51 33563   | PHONE OR PHONES                                                          |
|    | 52 15      | 51 AND 49                                                                |
|    | 53 127     | 48 OR 50 OR 52                                                           |
|    | 54 124     | 33 AND 53                                                                |
|    | 55 98      | check duplicates: unique in s=54                                         |

**Additional search in PsycINFO 27-11-2013**

|    |          |                                                                            |
|----|----------|----------------------------------------------------------------------------|
| C= | 13591189 | PI67                                                                       |
| S= | 2 114    | TI=SMARTPHONE? OR TI=SMART PHONE? OR TI=ANDROID?                           |
|    | 3 500    | TI=MOBILE PHONE?                                                           |
|    | 4 612    | 2 OR 3                                                                     |
|    | 5 87888  | TI=EXERCISE? OR TI=ACTIVIT? OR TI=OVERWEIGHT? OR TI=SPORT? OR TI=PHYSICAL? |
|    | 6 17     | 4 AND 5                                                                    |
|    | 7 8781   | TI=GAME OR TI=GAMES OR TI=GAMING                                           |
|    | 8 371    | 7 AND 5                                                                    |
|    | 9150264  | PHONE? OR APP OR APPS OR APPLICATION?                                      |

10 14 8 AND 9  
11 31 6 OR 10
