# Supplementary material for: Using Mobile Apps to Promote a Healthy Lifestyle Among Adolescents and Students: A Review of the Theoretical Basis and Lessons Learned
Source: PubMed Central journal article supplement (PMC4873621; doi:10.2196/mhealth.3559), 2016-05-05
Supplement: mhealth_v4i2e39_app2.pdf [file mhealth_v4i2e39_app2.pdf]

## Appendix 2: Search strategy Medline 14-11-2013

Database: MEDLINE 1950 to present

Search Strategy:

- 
- 1 exp Cellular Phone/ (4574)
  - 2 (app or apps or application\$.ti,ab. (633523)
  - 3 1 and 2 (675)
  - 4 exp Exercise/ (115313)
  - 5 exp Food/ (1068766)
  - 6 exp Body Weight/ (354226)
  - 7 (smartphone\$ or (smart adj phone\$) or (mobile adj phone\$)).ti,ab. (3109)
  - 8 exp Telemedicine/ (15602)
  - 9 exp Internet/ (53914)
  - 10 3 and 4 (15)
  - 11 3 and 5 (9)
  - 12 3 and 6 (23)
  - 13 10 or 11 or 12 (41)
  - 14 7 and 4 (61)
  - 15 7 and 5 (51)
  - 16 7 and 6 (83)
  - 17 14 or 15 or 16 (178)
  - 18 8 and 4 (78)
  - 19 8 and 5 (19)
  - 20 8 and 6 (130)
  - 21 18 or 19 or 20 (201)
  - 22 9 and (4 or 5 or 6) (1406)
  - 23 exp \*Internet/ and (exp \*Exercise/ or exp \*Food/ or exp \*Body Weight/) (465)
  - 24 2 and 23 (19)
  - 25 exp adult children/ or exp adolescent/ or exp young adult/ (1788957)
  - 26 13 and 25 (16)
  - 27 17 and 25 (48)
  - 28 21 and 25 (33)
  - 29 24 and 25 (1)
  - 30 22 and 25 (305)
  - 31 30 and (2 or 7) (13)
  - 32 31 not (26 or 27 or 28) (7)
  - 33 26 or 27 or 28 (83)
  - 34 mhealth\$.ti,ab. (127)
  - 35 34 and (4 or 5 or 6) (6)
  - 36 35 and 25 (2)
  - 37 33 or 36 (84)
  - 38 limit 37 to yr="2009 -Current" (75)
