# Supplementary material for: Using Mobile Apps to Promote a Healthy Lifestyle Among Adolescents and Students: A Review of the Theoretical Basis and Lessons Learned
Source: PubMed Central journal article supplement (PMC4873621; doi:10.2196/mhealth.3559), 2016-05-05
Supplement: mhealth_v4i2e39_app3.pdf [file mhealth_v4i2e39_app3.pdf]

### Appendix 3: Eligible table

| Nr . | Title                                                                                                                                                                               | First Author, year of publication, country | Database         | Included | Reason for exclusion                                                   |
|------|-------------------------------------------------------------------------------------------------------------------------------------------------------------------------------------|--------------------------------------------|------------------|----------|------------------------------------------------------------------------|
| 1    | Comparison of traditional versus mobile app self-monitoring of physical activity and dietary intake among overweight adults participating in an mHealth weight loss program         | Turner-McGrievy , 2013, USA                | Scopus & Medline | no       | Target group are adults                                                |
| 2    | SMART MOVE - a smartphone-based intervention to promote physical activity in primary care: Study protocol for a randomized controlled trial                                         | Glynn, 2013, Ireland                       | Scopus           | no       | Target group are adults                                                |
| 3    | TXT2BFiT' a mobile phone-based healthy lifestyle program for preventing unhealthy weight gain in young adults: Study protocol for a randomized controlled trial                     | Hebden, 2013, Australia                    | Scopus & Medline | yes      | App is also described in Hebden et al (2012)                           |
| 4    | Mobile games and design requirements to increase teenagers' physical activity                                                                                                       | Arteaga, 2012, USA/Mexico                  | Scopus           | no       | The researchers have not developed an app                              |
| 5    | A comparative study of pattern recognition classifiers to predict physical activities using smartphones and wearable body sensors                                                   | Kouris, 2012, Greece                       | Scopus           | no       | Only basic monitoring data                                             |
| 6    | Children's perceptions of physical activity environments captured through ecological momentary assessment: A validation study                                                       | Dunton, 2012, USA                          | Scopus           | no       | Aim is not health promotion                                            |
| 7    | Development of smartphone applications for nutrition and physical activity behavior change                                                                                          | Hebden, 2012, Australia                    | Scopus           | yes      | App is also described in Hebden et al (2013)                           |
| 8    | Connecting Health and Technology (CHAT): Protocol of a randomized controlled trial to improve nutrition behaviours using mobile devices and tailored text messaging in young adults | Kerr, 2012, Australia                      | Scopus           | yes      | App is also described in Zhu et al. (2010) and Six et al. (2010; 2011) |

|    |                                                                                                                                                                                                                           |                        |                  |     |                                                                |
|----|---------------------------------------------------------------------------------------------------------------------------------------------------------------------------------------------------------------------------|------------------------|------------------|-----|----------------------------------------------------------------|
| 9  | Recognition of physical activities in overweight Hispanic youth using KNOWME networks                                                                                                                                     | Emken, 2012, USA       | Scopus & Medline | no  | Only basic monitoring data                                     |
| 10 | Design and rationale for the PREVAIL study: Effect of e-Health individually tailored encouragements to physical exercise on aerobic fitness among adolescents with congenital heart disease - A randomized clinical trial | Klausen, 2012, Denmark | Scopus           | no  | Target group are "patients" (congenital heart disease)         |
| 11 | Investigating the impact of a smart growth community on the contexts of children's physical activity using Ecological Momentary Assessment                                                                                | Dunton, 2010, USA      | Scopus & Medline | no  | Aim is not health promotion                                    |
| 12 | Desired features of smartphone applications promoting physical activity.                                                                                                                                                  | Rabin, 2011, USA       | Scopus           | no  | Target group are adults                                        |
| 13 | Investigating children's physical activity and sedentary behavior using ecological momentary assessment with mobile phones                                                                                                | Dunton, 2011, USA      | Scopus & Medline | yes | Only basic monitoring data                                     |
| 14 | Let's get technical! Gaming and technology for weight control and health promotion in children.                                                                                                                           | Baranowski, 2012, USA  | Medline          | no  | The researchers have not developed an app                      |
| 15 | A smartphone-supported weight loss program: design of the ENGAGED randomized controlled trial.                                                                                                                            | Pellegrini, 2012, USA  | Medline          | no  | Target group are adults                                        |
| 16 | Is there a valid app for that? Validity of a free pedometer iPhone application.                                                                                                                                           | Bergman, 2012, USA     | Medline          | no  | Only basic monitoring data                                     |
| 17 | Multiple behavior changes in diet and activity: a randomized controlled trial using mobile technology.                                                                                                                    | Spring, 2012, USA      | Medline          | no  | Target group are adults                                        |
| 18 | Comparison of known food weights with image-based portion-size automated estimation and adolescents' self-reported portion size.                                                                                          | Lee, 2012, USA         | Medline          | no  | Target group are diabetic patients, Only basic monitoring data |
| 19 | Validity of the Remote Food Photography Method (RFPM) for estimating energy and nutrient intake in near real-time.                                                                                                        | Martin, 2012, USA      | Medline          | no  | Target group are adults Only basic monitoring data             |

|    |                                                                                                                                                     |                            |         |     |                                                                      |
|----|-----------------------------------------------------------------------------------------------------------------------------------------------------|----------------------------|---------|-----|----------------------------------------------------------------------|
| 20 | Electronic health technology for the assessment of physical activity and eating habits in children and adolescents with overweight and obesity IDA. | Schiel, 2012, Germany      | Medline | yes | App is also described in Schiel et al. (2010)                        |
| 21 | Assessing the social and physical contexts of children's leisure-time physical activity: an ecological momentary assessment study.                  | Dunton, 2012, USA          | Medline | no  | Aim is not health promotion                                          |
| 22 | Consumer views on the potential use of mobile phones for the delivery of weight-loss interventions.                                                 | Gorton, 2011, New Zealand  | Medline | no  | Target group are adults<br>The researchers have not developed an app |
| 23 | Feasibility testing of an automated image-capture method to aid dietary recall.                                                                     | Arab, 2011, USA            | Medline | no  | Target group are adults<br>Only basic monitoring data                |
| 24 | Preliminary application of a new bolus insulin model for type 1 diabetes.                                                                           | Pelzer, 2011, South Africa | Medline | no  | Target group are diabetic patients                                   |
| 25 | Intelligent obesity interventions using Smartphones.                                                                                                | Wolfenden, 2010, Australia | Medline | no  | The researchers have not developed an app                            |
| 26 | Identification of determinants for weight reduction in overweight and obese children and adolescents.                                               | Schiel, 2010, Germany      | Medline | yes | App is also described in Schiel et al. (2012)                        |
| 27 | Evaluation of a mobile phone-based diet game for weight control.                                                                                    | Lee, 2010, South Korea     | Medline | no  | Target group are adults                                              |
| 28 | Interactive diary for diabetes: A useful and easy-to-use new telemedicine system to support the decision-making process in type 1 diabetes.         | Rossi, 2009, Italy         | Medline | no  | Target group are diabetic patients                                   |
| 29 | I-Challenge!, A nutrition and physical activity intervention using smart phones in physical education classes at a junior high school               | Mosquedo, 2012, USA        | Embase  | yes |                                                                      |
| 30 | A pilot study of a novel mhealth intervention to improve complementary feeding practices in                                                         | Singh, 2013, UK            | Embase  | no  | Target group is mothers and their infants                            |

|    |                                                                                                                                                                       |                         |         |     |                                                       |
|----|-----------------------------------------------------------------------------------------------------------------------------------------------------------------------|-------------------------|---------|-----|-------------------------------------------------------|
|    | Haryana State, India                                                                                                                                                  |                         |         |     |                                                       |
| 31 | Adherence to a smartphone application for weight loss compared to website and paper diary: pilot randomized controlled trial.                                         | Carter, 2013, UK        | Medline | yes | App is also described in Carter et al. (2012)         |
| 32 | BALANCE (Bioengineering Approaches for Lifestyle Activity and Nutrition Continuous Engagement): developing new technology for monitoring energy balance in real time. | Hughes, 2010, USA       | Medline | no  | Target group are adults                               |
| 33 | Design, development, and formative evaluation of a smartphone application for recording and monitoring physical activity levels: the 10,000 Steps "iStepLog".         | Kirwan, 2013, Australia | Medline | no  | Target group are adults<br>Only basic monitoring data |
| 34 | Development of an automated physical activity classification application for mobile phones.                                                                           | Xia, 2011, Australia    | Medline | no  | Target group are adults<br>Only basic monitoring data |
| 35 | Digital food guide: Mobile application to incorporate healthy food choices                                                                                            | Caivano, 2013, Brazil   | Embase  | no  | Target group are adults                               |
| 36 | Do arabic weight loss mobile applications comply with evidence-based weight management guidelines?                                                                    | Alnasser, 2013, UK      | Embase  | no  | Target group are adults                               |
| 37 | Food photo records for assessing daily food intake using a smart phone application in college students                                                                | Suzuki, 2012, USA       | Embase  | yes | Only abstract available                               |
| 38 | Implementing the dietary guidelines for Americans using new technologies as a channel for nutrition education: Evidence from research and best practices              | Blum-Kemelor, 2012, USA | Embase  | no  | The researchers have not developed an app             |
| 39 | Mobile applications for weight management: Theory-based content analysis                                                                                              | Azar, 2013, USA         | Embase  | no  | The researchers have not developed an app             |
| 40 | Mobile apps for pediatric obesity prevention and treatment, healthy eating, and physical activity promotion: Just fun and games?                                      | Schoffman, 2013, USA    | Embase  | no  | The researchers have not developed an app             |
| 41 | My Meal Mate (MMM): Validation of the diet measures captured on a                                                                                                     | Carter, 2012, UK        | Embase  | yes | App is also described in Carter et al.                |

|    |                                                                                                                     |                               |          |     |                                           |
|----|---------------------------------------------------------------------------------------------------------------------|-------------------------------|----------|-----|-------------------------------------------|
|    | smartphone application to facilitate weight loss                                                                    |                               |          |     | (2013)                                    |
| 42 | Self-assessment of the daily food intake in ALS via an application on a mobile device                               | Holm, 2011, Australia         | Embase   | no  | Target group are ALS patients             |
| 43 | Smartphone application for real-time dietary assessment and physical activity analyses in dietary counseling        | Beer-Borst, 2011, Switzerland | Embase   | no  | Target group are adults                   |
| 44 | Substance dependence (problem food) approach to childhood obesity, implemented as a smartphone APP: A pilot study   | Pretlow, 2012, USA            | Embase   | yes | Not yet published                         |
| 45 | Technology for health: A qualitative study on barriers to using the ipad for diet change                            | Lister, 2013, USA             | Embase   | no  | The researchers have not developed an app |
| 46 | Usability of mobile phone food records to assess dietary intake in adolescents                                      | Casperson, 2013, USA          | Embase   | yes | Not yet published                         |
| 47 | Using smartphone technology to monitor physical activity in the 10,000 Steps program: a matched case-control trial. | Kirwan, 2012, Australia       | Medline  | no  | Target group are adults                   |
| 48 | Using smartphones to maintain engagement of youth participation in 8-week walking program                           | Hongu, 2013, USA              | Embase   | yes | Only abstract available                   |
| 49 | Validity and reliability of a smart phone-based physical activity monitoring application                            | Gravante, 2012, UK            | Embase   | no  | Target group are adults                   |
| 50 | Weight loss-there is an app for that! But does it adhere to evidence-informed practices?                            | Breton, 2011, USA             | Embase   | no  | The researchers have not developed an app |
| 51 | A randomized clinical trial of mhealth supported exercise intervention in patients with metabolic syndrome          | Gill, 2013, Canada            | Embase   | no  | Target group have metabolic syndrome      |
| 52 | Activity recognition with android phone using mixture-of-experts co-trained with labeled and unlabeled data.        | Lee, 2014, South Korea        | PsycINFO | no  | Only basic monitoring data                |
| 53 | Can mobile phones be used to routinely monitor nutrition indicators? Experience from Liberia                        | Guyon, 2013, USA              | Embase   | no  | Only basic monitoring data                |

|    |                                                                                                                                                                                                                           |                               |              |    |                                                         |
|----|---------------------------------------------------------------------------------------------------------------------------------------------------------------------------------------------------------------------------|-------------------------------|--------------|----|---------------------------------------------------------|
| 54 | Classification accuracies of physical activities using smartphone motion sensors.                                                                                                                                         | Whu, 2012, USA                | PsycIN<br>FO | no | Only basic monitoring data                              |
| 55 | Comparison of physical activity measures using mobile phone-based CalFit and actigraph.                                                                                                                                   | Donaire-Gonzalez, 2013, Spain | PsycIN<br>FO | no | Target group are adults<br>Only basic monitoring data   |
| 56 | Design and rationale for the PREVAIL study: Effect of e-Health individually tailored encouragements to physical exercise on aerobic fitness among adolescents with congenital heart disease - A randomized clinical trial | Klausen, 2012, Denmark        | Embase       | no | Target group are patients with congenital heart disease |
| 57 | Education, reregistration, and recommendation effect of iPhone Poomsae education app in Taekwondo academy.                                                                                                                | Ha, 2011, South Korea         | Embase       | no | Aim is not health promotion                             |
| 58 | Harnessing Different Motivational Frames via Mobile Phones to Promote Daily Physical Activity and Reduce Sedentary Behavior in Aging Adults                                                                               | King, 2013, USA               | Embase       | no | Target group are adults                                 |
| 59 | Innovation to motivation-pilot study of a mobile phone intervention to increase physical activity among sedentary women.                                                                                                  | Fukuoka, 2010, USA            | PsycIN<br>FO | no | Target group are adults                                 |
| 60 | Iterative development of MobileMums: a physical activity intervention for women with young children.                                                                                                                      | Fjeldsoe, 2012, Australia     | Medline      | no | Target group are adults                                 |
| 61 | iWander: An Android application for dementia patients.                                                                                                                                                                    | Sposaro, 2010, USA            | Medline      | no | Target group are adults                                 |
| 62 | Measuring physical activity in a cardiac rehabilitation population using a smartphone-based questionnaire.                                                                                                                | Pfaeffli, 2013, New Zealand   | PsycIN<br>FO | no | Target group are patients with cardiac problems         |
| 63 | Nigerian women participating in an integrated microcredit and mhealth breastfeeding promotion intervention were more likely to adopt international breastfeeding recommendations                                          | Flax, 2013, USA               | Embase       | no | Target group are adults                                 |
| 64 | Physical activity monitoring and sharing platform for manual wheelchair users.                                                                                                                                            | Ding, 2012, USA               | Medline      | no | Only basic monitoring data                              |
| 65 | Promoting behavior change from alcohol use through                                                                                                                                                                        | Cohn, 2011,                   | Embase       | no | Topic is use                                            |

|    |                                                                                                                                                      |                           |                                        |     |                                                                              |
|----|------------------------------------------------------------------------------------------------------------------------------------------------------|---------------------------|----------------------------------------|-----|------------------------------------------------------------------------------|
|    | mobile technology: The future of ecological momentary assessment                                                                                     | USA                       |                                        |     |                                                                              |
| 66 | Qualitative exploration of the acceptability of a mobile phone and pedometer-based physical activity program in a diverse sample of sedentary women. | Fukuoka, 2012, USA        | PsycINFO                               | no  | Target group are adults                                                      |
| 67 | Reliability and validity of gait analysis by android-based smartphone.                                                                               | Nishiuchi, 2012, Japan    | Embase                                 | no  | Target group are adults<br>Only basic monitoring data                        |
| 68 | The impact of the application "iNST" development for nutrition support for patients in Japan                                                         | Ino, 2012, Japan          | Embase                                 | no  | Target group are patients and adults                                         |
| 69 | The mPED randomized controlled clinical trial: applying mobile persuasive technologies to increase physical activity in sedentary women protocol.    | Fukuoka, 2011, USA        | Medline                                | no  | Target group are adults                                                      |
| 70 | The TiltMeter app is a novel and accurate measurement tool for the weight bearing lunge test                                                         | Williams, 2013, Australia | Embase                                 | no  | Focus is not on nutrition, PA or overweight.                                 |
| 71 | Towards the run and walk activity classification through step detection--an android application.                                                     | Oner, 2012, USA           | Medline                                | no  | Only basic monitoring data                                                   |
| 72 | Usability and feasibility of mobile phone diaries in an experimental physical exercise study.                                                        | Heinonen, 2012, Finland   | Medline                                | no  | Only basic monitoring data                                                   |
| 73 | Use of a mobile phone diary for observing weight management and related behaviours.                                                                  | Mattila, 2010, Finland    | Medline                                | no  | Target group are adults                                                      |
| 74 | Using mHealth technology to enhance self-monitoring for weight loss: a randomized trial.                                                             | Burke, 2012, USA          | Medline                                | no  | Target group are adults                                                      |
| 75 | The use of mobile devices in aiding dietary assessment and evaluation                                                                                | Zhu, 2010, USA            | Snowball (Lee, 2012, Medline search 1) | yes | App is also described in Six et al. (2010; 2011) and Kerr et al. (2012)      |
| 76 | Evidence-based development of a mobile telephone record                                                                                              | Six, 2010, USA            | Snowball (Lee, 2012, Medline)          | yes | App is also described in Zhu et al. (2010), Six et al (2011) and Kerr et al. |

|    |                                                                                                         |                      |                                        |     |                                                                                      |
|----|---------------------------------------------------------------------------------------------------------|----------------------|----------------------------------------|-----|--------------------------------------------------------------------------------------|
|    |                                                                                                         |                      | search 1)                              |     | (2012)                                                                               |
| 77 | Evaluation of the food and nutrient database for dietary studies for use with a mobile telephone record | Six, 2011, USA       | Snowball (Lee, 2012, Medline search 1) | yes | App is also described in Zhu et al. (2010) and Kerr et al. (2012), Six et al. (2010) |
| 78 | Personal dietary assessment using mobile devices                                                        | Mariappan, 2009, USA | Snowball (Lee, 2012, Medline search 1) | no  | Only basic monitoring data                                                           |
